# Supplementary material for: Role of UHRF1 in de novo DNA methylation in oocytes and maintenance methylation in preimplantation embryos
Source: PubMed Central journal article supplement (PMC5643148; doi:10.1371/journal.pgen.1007042), 2017-10-04
Supplement: pgen.1007042.s009.pdf [file pgen.1007042.s009.pdf]

**S2 Table. Number of methylated cytosines.**

| Sample                        | Genotype                                        | CG         |             | CHG        |               | CHH         |               |
|-------------------------------|-------------------------------------------------|------------|-------------|------------|---------------|-------------|---------------|
|                               |                                                 | 5mC        | Total C     | 5mC        | Total C       | 5mC         | Total C       |
| FGO                           |                                                 |            |             |            |               |             |               |
| Control <sup>1)</sup>         | <i>Uhrf1</i> <sup>2lox/2lox</sup> or <i>+/+</i> | 93,863,126 | 243,339,359 | 38,471,739 | 1,093,560,979 | 104,700,461 | 3,458,664,784 |
| <i>Dnmt1</i> KO <sup>1)</sup> | <i>Dnmt1</i> <sup>1lox/1lox</sup>               | 54,479,097 | 151,510,932 | 35,152,007 | 807,735,328   | 94,863,903  | 2,579,198,801 |
| <i>Uhrf1</i> KO               | <i>Uhrf1</i> <sup>1lox/1lox</sup>               | 51,052,791 | 164,746,261 | 18,290,660 | 625,681,166   | 52,078,027  | 2,012,372,210 |
| Blastocyst                    |                                                 |            |             |            |               |             |               |
| Control                       | <i>Uhrf1</i> <sup>2lox/+</sup>                  | 12,091,822 | 84,631,546  | 2,823,687  | 444,988,284   | 9,010,011   | 1,485,909,807 |
| <i>Dnmt1</i> mat-KO           | <i>Dnmt1</i> <sup>1lox/+</sup>                  | 8,815,301  | 152,115,027 | 3,483,740  | 787,122,826   | 10,710,159  | 2,492,576,562 |
| <i>Uhrf1</i> mat-KO           | <i>Uhrf1</i> <sup>1lox/+</sup>                  | 4,501,128  | 129,657,719 | 6,175,725  | 675,163,607   | 20,286,779  | 2,233,844,172 |

The numbers obtained from all reads in the WGBS replicates.

<sup>1)</sup>Shirane *et al.*, PLoS Genet, 2013
