# Supplementary material for: Role of UHRF1 in de novo DNA methylation in oocytes and maintenance methylation in preimplantation embryos
Source: PubMed Central journal article supplement (PMC5643148; doi:10.1371/journal.pgen.1007042), 2017-10-04
Supplement: pgen.1007042.s012.pdf [file pgen.1007042.s012.pdf]

**S5 Table. List of PCR primers.**

| <b>Primer name</b>          | <b>Sequence</b>                  |
|-----------------------------|----------------------------------|
| <b>Genotyping</b>           |                                  |
| <i>Uhrf1</i> exon 3F        | 5'-AAGACTGTGTGGGAGGACAC-3'       |
| <i>Uhrf1</i> intron 3R      | 5'-AAGTGATGTGGTCACAGAGG-3'       |
| <i>Uhrf1</i> exon 6R        | 5'-TGTTGAGCTGAGAGTCATTC-3'       |
| <i>Dnmt1</i> exon 3F        | 5'-AGCCAGTTGTGTGACTTGG-3'        |
| <i>Dnmt1</i> exon 4R        | 5'-CTTGGGCCTGGATCTTGGGGA-3'      |
| <i>Dnmt1</i> intron 5R      | 5'-ATGCATAGGAACAGATGTGTGC-3'     |
| Cre F                       | 5'-GCAGAACCTGAAGATGTTCGCGAT-3'   |
| Cre R                       | 5'-AGGTATCTCTGACCAGAGTCATCC-3'   |
| <b>RT-PCR</b>               |                                  |
| <i>Dnmt3a</i> exon 9F       | 5'-GCCGAATTGTGTCTTGGTGGATGACA-3' |
| <i>Dnmt3a</i> exon 10R      | 5'-CCTGGTGGAAATGCACTGCAGAAGGA-3' |
| <i>Dnmt3b</i> exon 3F       | 5'-TTCAGTGACCAGTCCTCAGACACGAA-3' |
| <i>Dnmt3b</i> exon 4R       | 5'-TCAGAAGGCTGGAGACCTCCCTCTT-3'  |
| <i>Dnmt3L</i> exon 10F      | 5'-GTGCGGGTACTGAGCCTTTTTAGA-3'   |
| <i>Dnmt3L</i> exon 11R      | 5'-CGACATTTGTGACATCTTCCACGTA-3'  |
| <i>Dnmt1</i> exon7 Fwd      | 5'-CCTAGTTCCGTGGCTACGAGGAGAA-3'  |
| <i>Dnmt1</i> exon8 Rev      | 5'-TCTCTCTCCTCTGCAGCCGACTCA-3'   |
| <i>Uhrf1</i> qEx2F (exon 2) | 5'-CGTGA ACTCTCTGTCCAGGT-3'      |
| <i>Uhrf1</i> qEx3R (exon 3) | 5'-GTCATTGAGGCGCACATCAT-3'       |
| <i>Uhrf1</i> F2 (exon 12)   | 5'-GCATCTACAAGGTGGTGAAG-3'       |
| <i>Uhrf1</i> R2 (exon 13)   | 5'-AGGCTCTGTGTCATCTCGTC-3'       |
| <i>Gapdh</i> F1             | 5'-ATGTTTGTGATGGGTGTGAAC-3'      |
| <i>Gapdh</i> R1             | 5'-CATTGTCATACGGAAATGAGC-3'      |
